# Supplementary material
Source: ML conference proceedings conference paper supplement (https://proceedings.neurips.cc/paper_files/paper/2021/hash/498f940d9b933c529b06aa96d18f7eda-Abstract.html)
Supplement: Supplementary file 1 [file 498f940d9b933c529b06aa96d18f7eda-Supplemental.zip]

Archive with 57 entries (43 files):
- inverse_problems_leveraging_pr-Supplementary Material/
- inverse_problems_leveraging_pr-Supplementary Material/NEURIPS21_SUPPLEMENT/
- inverse_problems_leveraging_pr-Supplementary Material/NEURIPS21_SUPPLEMENT/Code/
- inverse_problems_leveraging_pr-Supplementary Material/NEURIPS21_SUPPLEMENT/Code/.gitignore
- inverse_problems_leveraging_pr-Supplementary Material/NEURIPS21_SUPPLEMENT/Code/appendix_experiment_transfer_clean_classifier.ipynb
- inverse_problems_leveraging_pr-Supplementary Material/NEURIPS21_SUPPLEMENT/Code/baselines.py
- inverse_problems_leveraging_pr-Supplementary Material/NEURIPS21_SUPPLEMENT/Code/clip_files/
- inverse_problems_leveraging_pr-Supplementary Material/NEURIPS21_SUPPLEMENT/Code/clip_files/bpe_simple_vocab_16e6.txt.gz
- inverse_problems_leveraging_pr-Supplementary Material/NEURIPS21_SUPPLEMENT/Code/clip_files/clip.py
- inverse_problems_leveraging_pr-Supplementary Material/NEURIPS21_SUPPLEMENT/Code/clip_files/model.py
- inverse_problems_leveraging_pr-Supplementary Material/NEURIPS21_SUPPLEMENT/Code/clip_files/simple_tokenizer.py
- inverse_problems_leveraging_pr-Supplementary Material/NEURIPS21_SUPPLEMENT/Code/clip_files/__init__.py
- inverse_problems_leveraging_pr-Supplementary Material/NEURIPS21_SUPPLEMENT/Code/config/
- inverse_problems_leveraging_pr-Supplementary Material/NEURIPS21_SUPPLEMENT/Code/config/ImageNet100C/
- inverse_problems_leveraging_pr-Supplementary Material/NEURIPS21_SUPPLEMENT/Code/config/ImageNet100C/sample.yaml
- inverse_problems_leveraging_pr-Supplementary Material/NEURIPS21_SUPPLEMENT/Code/config/inpainting_sample.yaml
- inverse_problems_leveraging_pr-Supplementary Material/NEURIPS21_SUPPLEMENT/Code/config/LinearProbeSubset/
- inverse_problems_leveraging_pr-Supplementary Material/NEURIPS21_SUPPLEMENT/Code/config/LinearProbeSubset/sample.yaml
- inverse_problems_leveraging_pr-Supplementary Material/NEURIPS21_SUPPLEMENT/Code/config/NoiseLevelTesting/
- inverse_problems_leveraging_pr-Supplementary Material/NEURIPS21_SUPPLEMENT/Code/config/NoiseLevelTesting/sample.yaml
- inverse_problems_leveraging_pr-Supplementary Material/NEURIPS21_SUPPLEMENT/Code/config/NoiseLevelTesting/sample_ood.yaml
- inverse_problems_leveraging_pr-Supplementary Material/NEURIPS21_SUPPLEMENT/Code/config/NoisyRN101/
- inverse_problems_leveraging_pr-Supplementary Material/NEURIPS21_SUPPLEMENT/Code/config/NoisyRN101/sample.yaml
- inverse_problems_leveraging_pr-Supplementary Material/NEURIPS21_SUPPLEMENT/Code/config/Supervised_CLIP_Baselines/
- inverse_problems_leveraging_pr-Supplementary Material/NEURIPS21_SUPPLEMENT/Code/config/Supervised_CLIP_Baselines/sample.yaml
- inverse_problems_leveraging_pr-Supplementary Material/NEURIPS21_SUPPLEMENT/Code/config/TransferLearning/
- inverse_problems_leveraging_pr-Supplementary Material/NEURIPS21_SUPPLEMENT/Code/config/TransferLearning/sample.yaml
- inverse_problems_leveraging_pr-Supplementary Material/NEURIPS21_SUPPLEMENT/Code/config/Transfer_NoiseLevels/
- inverse_problems_leveraging_pr-Supplementary Material/NEURIPS21_SUPPLEMENT/Code/config/Transfer_NoiseLevels/sample.yaml
- inverse_problems_leveraging_pr-Supplementary Material/NEURIPS21_SUPPLEMENT/Code/config/Transfer_NoiseLevels/sample_denoised.yaml
- inverse_problems_leveraging_pr-Supplementary Material/NEURIPS21_SUPPLEMENT/Code/deep_decoder/
- inverse_problems_leveraging_pr-Supplementary Material/NEURIPS21_SUPPLEMENT/Code/deep_decoder/include/
- inverse_problems_leveraging_pr-Supplementary Material/NEURIPS21_SUPPLEMENT/Code/deep_decoder/include/compression.py
- inverse_problems_leveraging_pr-Supplementary Material/NEURIPS21_SUPPLEMENT/Code/deep_decoder/include/decoder.py
- inverse_problems_leveraging_pr-Supplementary Material/NEURIPS21_SUPPLEMENT/Code/deep_decoder/include/fit.py
- inverse_problems_leveraging_pr-Supplementary Material/NEURIPS21_SUPPLEMENT/Code/deep_decoder/include/helpers.py
- inverse_problems_leveraging_pr-Supplementary Material/NEURIPS21_SUPPLEMENT/Code/deep_decoder/include/visualize.py
- inverse_problems_leveraging_pr-Supplementary Material/NEURIPS21_SUPPLEMENT/Code/deep_decoder/include/wavelet.py
- inverse_problems_leveraging_pr-Supplementary Material/NEURIPS21_SUPPLEMENT/Code/deep_decoder/include/__init__.py
- inverse_problems_leveraging_pr-Supplementary Material/NEURIPS21_SUPPLEMENT/Code/denoising_baselines.py
- inverse_problems_leveraging_pr-Supplementary Material/NEURIPS21_SUPPLEMENT/Code/imagenet100.txt
- inverse_problems_leveraging_pr-Supplementary Material/NEURIPS21_SUPPLEMENT/Code/imagenet100B.txt
- inverse_problems_leveraging_pr-Supplementary Material/NEURIPS21_SUPPLEMENT/Code/imagenet100c.py
- inverse_problems_leveraging_pr-Supplementary Material/NEURIPS21_SUPPLEMENT/Code/inpainting_test.py
- inverse_problems_leveraging_pr-Supplementary Material/NEURIPS21_SUPPLEMENT/Code/LICENSE
- inverse_problems_leveraging_pr-Supplementary Material/NEURIPS21_SUPPLEMENT/Code/linear_probe.py
- inverse_problems_leveraging_pr-Supplementary Material/NEURIPS21_SUPPLEMENT/Code/noise_level_testing.py
- inverse_problems_leveraging_pr-Supplementary Material/NEURIPS21_SUPPLEMENT/Code/noisy_clip_dataparallel.py
- inverse_problems_leveraging_pr-Supplementary Material/NEURIPS21_SUPPLEMENT/Code/ood_testing.py
- inverse_problems_leveraging_pr-Supplementary Material/NEURIPS21_SUPPLEMENT/Code/README.md
- inverse_problems_leveraging_pr-Supplementary Material/NEURIPS21_SUPPLEMENT/Code/requirements.txt
- inverse_problems_leveraging_pr-Supplementary Material/NEURIPS21_SUPPLEMENT/Code/slice_imagenet100.py
- inverse_problems_leveraging_pr-Supplementary Material/NEURIPS21_SUPPLEMENT/Code/slice_imagenet100c.py
- inverse_problems_leveraging_pr-Supplementary Material/NEURIPS21_SUPPLEMENT/Code/transfer_learning.py
- inverse_problems_leveraging_pr-Supplementary Material/NEURIPS21_SUPPLEMENT/Code/transfer_noiselevels.py
- inverse_problems_leveraging_pr-Supplementary Material/NEURIPS21_SUPPLEMENT/Code/utils.py
- inverse_problems_leveraging_pr-Supplementary Material/NEURIPS21_SUPPLEMENT/supplementary.pdf
