# Supplementary material
Source: ML conference proceedings conference paper supplement (https://proceedings.neurips.cc/paper_files/paper/2021/hash/498f940d9b933c529b06aa96d18f7eda-Abstract.html)
Supplement: Supplementary file 1 [file 498f940d9b933c529b06aa96d18f7eda-Supplemental.zip › inverse_problems_leveraging_pr-Supplementary Material/NEURIPS21_SUPPLEMENT/Code/config/ImageNet100C/sample.yaml]

#data 
dataset_dir: "/tmp/ImageNet100C/"
dataset: "ImageNet100C"
num_classes: 100
emb_dim: 512

#distributed training
num_nodes: 1
gpus: 1
workers: 12
#distributed_backend: "ddp"

###############################################

#Experiment Stuff 
experiment_name: "sample_imagenet100c"
checkpoint_path: "/path/to/contrastive_student.ckpt"

#Distortions and parameters 
distortion: "None"  #Must be None here!
saved_model_type: "linear" # linear|baseline

encoder: "clip"

#logging
log_save_interval: 25 
row_log_interval: 1
logdir: "/tmp/Logs"

results_dir: './results'

#validation
check_val_every_n_epoch: 1
