# Supplementary material
Source: ML conference proceedings conference paper supplement (https://proceedings.neurips.cc/paper_files/paper/2021/hash/498f940d9b933c529b06aa96d18f7eda-Abstract.html)
Supplement: Supplementary file 1 [file 498f940d9b933c529b06aa96d18f7eda-Supplemental.zip › inverse_problems_leveraging_pr-Supplementary Material/NEURIPS21_SUPPLEMENT/Code/config/inpainting_sample.yaml]

#seed 
seed: 1234

#data
dataset_dir: "/path/to/ImageNet-100/root/"
dataset: "ImageNet100"
num_classes: 100
emb_dim: 512

#distributed training
num_nodes: 1
gpus: 1
workers: 1

###############################################

#Experiment Stuff 
experiment_name: "INPAINTING_BASELINE"
checkpoint_path: "/path/to/checkpoint_file.ckpt"

distortion: "randommask" 
percent_missing: 0.5 

encoder: "resnet"

#logging
log_save_interval: 10 
row_log_interval: 1
logdir: "/tmp/Logs"
results_dir: "/tmp/Inpainting"

#validation
check_val_every_n_epoch: 1
