# Supplementary material
Source: ML conference proceedings conference paper supplement (https://proceedings.neurips.cc/paper_files/paper/2021/hash/498f940d9b933c529b06aa96d18f7eda-Abstract.html)
Supplement: Supplementary file 1 [file 498f940d9b933c529b06aa96d18f7eda-Supplemental.zip › inverse_problems_leveraging_pr-Supplementary Material/NEURIPS21_SUPPLEMENT/Code/config/NoisyRN101/sample.yaml]

#seed 
seed: 1234

#data 
dataset_dir: "/tmp/imagenet100"
dataset: "ImageNet100"
subset_file_name: "imagenet100.txt"
num_classes: 100
emb_dim: 512

#distributed training 
num_nodes: 1
gpus: 1
workers: 12
distributed_backend: "dp" #DP instead of DDP to accomodate for larger batch size

###############################################

#Experiment Stuff
experiment_name: "sample_student"

#Distortions and parameters 
encoder: "clip"
baseclip_type: "RN101"
device: "cpu" #Original device where baseclip is loaded
loss_type: "simclr" #can also be mse

distortion: "randommask" #randommask/gaussiannoise/gaussianblur/squaremask
fixed_mask: False
percent_missing: 0.9 #only for randommask - can be float from 0 to 1 for set number of missing pixels, or two floats for uniform range of missing pixels.

lr: 0.0003
weight_decay: 0.0001
batch_size: 16
loss_tau: 0.1 #tau parameter for our loss
logit_scale: 0.07 #logit scale for zeroshot - inherited from original CLIP

mapping_and_text_file: "./mapping_text_labels_imagenet100.pkl" #Save text labels of dataset for reuse.
save_mapping_and_text: True

#training
max_epochs: 25
log_save_interval: 25
row_log_interval: 1
logdir: "/tmp"
sync_bn: True

#validation
check_val_every_n_epoch: 1
