# Supplementary material
Source: ML conference proceedings conference paper supplement (https://proceedings.neurips.cc/paper_files/paper/2021/hash/498f940d9b933c529b06aa96d18f7eda-Abstract.html)
Supplement: Supplementary file 1 [file 498f940d9b933c529b06aa96d18f7eda-Supplemental.zip › inverse_problems_leveraging_pr-Supplementary Material/NEURIPS21_SUPPLEMENT/Code/config/Supervised_CLIP_Baselines/sample.yaml]

#seed 
seed: 1234

#data
dataset_dir: "/tmp/ImageNet100/"
dataset: "ImageNet100"
num_classes: 100

#distributed training
num_nodes: 1
gpus: 1
workers: 12
distributed_backend: "ddp"

###############################################

#Experiment Stuff 
experiment_name: "sample_baseline"

#Distortions and parameters 
distortion: "randommask" #randommask/gaussiannoise/gaussianblur/squaremask
percent_missing: 0.9
fixed_mask: False

#model 
encoder: "resnet" #'clip' or 'resnet'
resnet_model: '101' #'ViT-B/32' or 'RN50' or "RN101" or "RN50x4", only matters if encoder: "clip"
freeze_backbone: False

#training
max_epochs: 25
lr: 0.001
batch_size: 16

#logging
log_save_interval: 1 #set this to be equal to num_epochs if row_log_interval is 1
row_log_interval: 1
logdir: "/tmp/Logs"

#validation
check_val_every_n_epoch: 1
