# Supplementary material
Source: ML conference proceedings conference paper supplement (https://proceedings.neurips.cc/paper_files/paper/2021/hash/498f940d9b933c529b06aa96d18f7eda-Abstract.html)
Supplement: Supplementary file 1 [file 498f940d9b933c529b06aa96d18f7eda-Supplemental.zip › inverse_problems_leveraging_pr-Supplementary Material/NEURIPS21_SUPPLEMENT/Code/deep_decoder/include/decoder.py]

import torch
import torch.nn as nn

def add_module(self, module):
    self.add_module(str(len(self) + 1), module)

torch.nn.Module.add = add_module


def conv(in_f, out_f, kernel_size, stride=1, pad='zero'):
    padder = None
    to_pad = int((kernel_size - 1) / 2)
    if pad == 'reflection':
        padder = nn.ReflectionPad2d(to_pad)
        to_pad = 0
  
    convolver = nn.Conv2d(in_f, out_f, kernel_size, stride, padding=to_pad, bias=False)

    layers = filter(lambda x: x is not None, [padder, convolver])
    return nn.Sequential(*layers)

def decodernw(
        num_output_channels=3, 
        num_channels_up=[128]*5, 
        filter_size_up=1,
        need_sigmoid=True, 
        pad ='reflection', 
        upsample_mode='bilinear', 
        act_fun=nn.ReLU(), # nn.LeakyReLU(0.2, inplace=True) 
        bn_before_act = False,
        bn_affine = True,
        upsample_first = True,
        ):
    
    num_channels_up = num_channels_up + [num_channels_up[-1],num_channels_up[-1]]
    n_scales = len(num_channels_up) 
    
    if not (isinstance(filter_size_up, list) or isinstance(filter_size_up, tuple)) :
        filter_size_up   = [filter_size_up]*n_scales
    model = nn.Sequential()

    
    for i in range(len(num_channels_up)-1):
        
        if upsample_first:
            model.add(conv( num_channels_up[i], num_channels_up[i+1],  filter_size_up[i], 1, pad=pad))
            if upsample_mode!='none' and i != len(num_channels_up)-2:
                model.add(nn.Upsample(scale_factor=2, mode=upsample_mode))
            #model.add(nn.functional.interpolate(size=None,scale_factor=2, mode=upsample_mode))	
        else:
            if upsample_mode!='none' and i!=0:
                model.add(nn.Upsample(scale_factor=2, mode=upsample_mode))
            #model.add(nn.functional.interpolate(size=None,scale_factor=2, mode=upsample_mode))	
            model.add(conv( num_channels_up[i], num_channels_up[i+1],  filter_size_up[i], 1, pad=pad))        
        
        if i != len(num_channels_up)-1:	
            if(bn_before_act): 
                model.add(nn.BatchNorm2d( num_channels_up[i+1] ,affine=bn_affine))
            model.add(act_fun)
            if(not bn_before_act): 
                model.add(nn.BatchNorm2d( num_channels_up[i+1], affine=bn_affine))
      
    model.add(conv( num_channels_up[-1], num_output_channels, 1, pad=pad))
    if need_sigmoid:
        model.add(nn.Sigmoid())
    
    return model


# Residual block
class ResidualBlock(nn.Module):
    def __init__(self, in_f, out_f):
        super(ResidualBlock, self).__init__()
        self.conv = nn.Conv2d(in_f, out_f, 1, 1, padding=0, bias=False)
        
    def forward(self, x):
        residual = x
        out = self.conv(x)
        out += residual
        return out

def resdecoder(
        num_output_channels=3, 
        num_channels_up=[128]*5, 
        filter_size_up=1,
        need_sigmoid=True, 
        pad='reflection', 
        upsample_mode='bilinear', 
        act_fun=nn.ReLU(), # nn.LeakyReLU(0.2, inplace=True) 
        bn_before_act = False,
        bn_affine = True,
        ):
    
    num_channels_up = num_channels_up + [num_channels_up[-1],num_channels_up[-1]]
    n_scales = len(num_channels_up) 
    
    if not (isinstance(filter_size_up, list) or isinstance(filter_size_up, tuple)) :
        filter_size_up   = [filter_size_up]*n_scales

    model = nn.Sequential()

    for i in range(len(num_channels_up)-2):
        
        model.add( ResidualBlock( num_channels_up[i], num_channels_up[i+1]) )
        
        if upsample_mode!='none':
            model.add(nn.Upsample(scale_factor=2, mode=upsample_mode))	
            #model.add(nn.functional.interpolate(size=None,scale_factor=2, mode=upsample_mode))	
        
        if i != len(num_channels_up)-1:	
            model.add(act_fun)
            #model.add(nn.BatchNorm2d( num_channels_up[i+1], affine=bn_affine))
                
    # new
    model.add(ResidualBlock( num_channels_up[-1], num_channels_up[-1]))
    #model.add(nn.BatchNorm2d( num_channels_up[-1] ,affine=bn_affine))
    model.add(act_fun)
    # end new
    
    model.add(conv( num_channels_up[-1], num_output_channels, 1, pad=pad))
    
    if need_sigmoid:
        model.add(nn.Sigmoid())
    
    return model
