# Supplementary material
Source: ML conference proceedings conference paper supplement (https://proceedings.neurips.cc/paper_files/paper/2021/hash/498f940d9b933c529b06aa96d18f7eda-Abstract.html)
Supplement: Supplementary file 1 [file 498f940d9b933c529b06aa96d18f7eda-Supplemental.zip › inverse_problems_leveraging_pr-Supplementary Material/NEURIPS21_SUPPLEMENT/Code/imagenet100.txt]

n02869837
n01749939
n02488291
n02107142
n13037406
n02091831
n04517823
n04589890
n03062245
n01773797
n01735189
n07831146
n07753275
n03085013
n04485082
n02105505
n01983481
n02788148
n03530642
n04435653
n02086910
n02859443
n13040303
n03594734
n02085620
n02099849
n01558993
n04493381
n02109047
n04111531
n02877765
n04429376
n02009229
n01978455
n02106550
n01820546
n01692333
n07714571
n02974003
n02114855
n03785016
n03764736
n03775546
n02087046
n07836838
n04099969
n04592741
n03891251
n02701002
n03379051
n02259212
n07715103
n03947888
n04026417
n02326432
n03637318
n01980166
n02113799
n02086240
n03903868
n02483362
n04127249
n02089973
n03017168
n02093428
n02804414
n02396427
n04418357
n02172182
n01729322
n02113978
n03787032
n02089867
n02119022
n03777754
n04238763
n02231487
n03032252
n02138441
n02104029
n03837869
n03494278
n04136333
n03794056
n03492542
n02018207
n04067472
n03930630
n03584829
n02123045
n04229816
n02100583
n03642806
n04336792
n03259280
n02116738
n02108089
n03424325
n01855672
n02090622
