# Supplementary material
Source: ML conference proceedings conference paper supplement (https://proceedings.neurips.cc/paper_files/paper/2021/hash/498f940d9b933c529b06aa96d18f7eda-Abstract.html)
Supplement: Supplementary file 1 [file 498f940d9b933c529b06aa96d18f7eda-Supplemental.zip › inverse_problems_leveraging_pr-Supplementary Material/NEURIPS21_SUPPLEMENT/Code/imagenet100B.txt]

n02088364
n03000134
n03544143
n03388043
n02165105
n02321529
n01819313
n03187595
n01667114
n02097130
n02104365
n02279972
n12985857
n01773549
n12057211
n02791270
n01491361
n02169497
n02793495
n02281787
n02840245
n01688243
n03920288
n02488702
n03884397
n07745940
n01484850
n04147183
n04356056
n01644900
n02132136
n02999410
n02457408
n04540053
n02776631
n02107574
n02930766
n04263257
n03724870
n04081281
n04258138
n02280649
n02492660
n03782006
n03495258
n04254120
n02391049
n04254777
n07716906
n03888605
n01843065
n02643566
n04515003
n03125729
n04179913
n03788365
n02098286
n02109525
n02966193
n03929660
n03670208
n03483316
n02777292
n03602883
n03982430
n02808440
n03207743
n02096177
n01742172
n03792782
n01795545
n03534580
n03814906
n02342885
n03692522
n03272010
n09468604
n03720891
n03717622
n02177972
n02013706
n02797295
n04366367
n03857828
n04243546
n03891332
n03796401
n03314780
n04039381
n01498041
n01990800
n03976657
n02107683
n02229544
n03063599
n03127747
n03179701
n03016953
n09193705
n04033901
