# Supplementary material
Source: ML conference proceedings conference paper supplement (https://proceedings.neurips.cc/paper_files/paper/2021/hash/498f940d9b933c529b06aa96d18f7eda-Abstract.html)
Supplement: Supplementary file 1 [file 498f940d9b933c529b06aa96d18f7eda-Supplemental.zip › inverse_problems_leveraging_pr-Supplementary Material/NEURIPS21_SUPPLEMENT/Code/imagenet100c.py]

#!/usr/bin/env python

import os
import argparse
import numpy as np
import torch

from utils import *

from pytorch_lightning import Trainer, LightningDataModule, seed_everything
from pytorch_lightning.loggers import TensorBoardLogger
from torch.utils.data  import DataLoader

from linear_probe import LinearProbe
from baselines import Baseline

DISTORTIONS = ['blur', 'digital', 'extra', 'noise', 'weather']
SUB_DISTORTIONS = {'blur': ['defocus_blur', 'glass_blur', 'motion_blur', 'zoom_blur'],
                   'digital': ['contrast', 'elastic_transform', 'jpeg_compression', 'pixelate'],
                   'extra': ['gaussian_blur', 'saturate', 'spatter', 'speckle_noise'],
                   'noise': ['gaussian_noise', 'impulse_noise', 'shot_noise'],
                    'weather': ['brightness', 'fog', 'frost', 'snow']
                    }
LEVELS = ['1','2','3','4','5']

class ImageNet100CTest(LightningDataModule):
    """
    This class loads the validation set of ImageNet100C, to be used only for testing.
    Implemented separately because it is linked to both end-to-end suprevised and contrastive training.
    """
    def __init__(self, args, distortion, sub_distortion, level):
        super(ImageNet100CTest, self).__init__()

        self.hparams = args

        self.distortion = distortion
        self.sub_distortion = sub_distortion
        self.level = level

        self.dataset_dir = self.hparams.dataset_dir

        self.val_set_transform = ImageNetBaseTransformVal(self.hparams)

    def setup(self, stage=None):
        self.val_data = ImageNet100C(
            root=self.hparams.dataset_dir,
            distortion=self.distortion,
            sub_distortion=self.sub_distortion,
            level = self.level,
            transform=self.val_set_transform
        )

    def test_dataloader(self):
        return DataLoader(self.val_data, batch_size=512, num_workers=self.hparams.workers, worker_init_fn=(lambda wid: np.random.seed(int(torch.rand(1)[0]*1e6) + wid)), pin_memory=True, shuffle=False)


def grab_config():
    parser = argparse.ArgumentParser(description="NoisyCLIP")

    parser.add_argument('--config_file')

    config = yaml_config_hook(parser.parse_args().config_file)
    for k, v in config.items():
        parser.add_argument(f"--{k}", default=v, type=type(v))

    args = parser.parse_args()

    return args

def noise_level_eval():
    args = grab_config()
    args.gpus = [0] # Force evaluation in a single gpu.

    seed_everything(42)

    logger = TensorBoardLogger(
        save_dir=args.logdir,
        version=args.experiment_name,
        name='NoisyCLIP_Logs'
    )
    trainer = Trainer.from_argparse_args(args, logger=logger)

    if not os.path.exists(os.path.join(args.results_dir, args.experiment_name)):
        os.mkdir(os.path.join(args.results_dir, args.experiment_name))

    for distortion in DISTORTIONS:
        print(distortion)
        for sub_distortion in SUB_DISTORTIONS[distortion]:
            print(sub_distortion)
            top_1_list = []
            top_5_list = []

            if not os.path.exists(os.path.join(args.results_dir, args.experiment_name, distortion)):
                os.makedirs(os.path.join(args.results_dir, args.experiment_name, distortion))

            for level in LEVELS:
                print(level)

                #Choose the appropriate model based on type, and load from checkpoint.
                if args.saved_model_type == 'linear':
                    saved_model = LinearProbe.load_from_checkpoint(args.checkpoint_path)
                elif args.saved_model_type == 'baseline':
                    saved_model = Baseline.load_from_checkpoint(args.checkpoint_path)

                #Load the appropriate data and run the test once with the saved model
                test_data = ImageNet100CTest(args, distortion=distortion, sub_distortion=sub_distortion, level=level)
                results = trainer.test(model=saved_model, datamodule=test_data, verbose=False)

                top1_accs = results[0]['test_top_1']
                top5_accs = results[0]['test_top_5']

                print(top1_accs)

                top_1_list.extend([top1_accs])
                top_5_list.extend([top5_accs])

                with open(os.path.join(args.results_dir, args.experiment_name, distortion, sub_distortion + '.out'), 'a+') as f:
                    f.write(level + ':\t{0:.4f}'.format(top1_accs) + '\t{0:.4f}\n'.format(top5_accs))

            with open(os.path.join(args.results_dir, args.experiment_name, distortion, sub_distortion + '.out'), 'a+') as f:
                f.write('MEAN:\t{0:.4f}\t{1:.4f}\n'.format(np.mean(top_1_list), np.mean(top_5_list)))

if __name__ == "__main__":
    noise_level_eval()
