# Supplementary material
Source: ML conference proceedings conference paper supplement (https://proceedings.neurips.cc/paper_files/paper/2021/hash/498f940d9b933c529b06aa96d18f7eda-Abstract.html)
Supplement: Supplementary file 1 [file 498f940d9b933c529b06aa96d18f7eda-Supplemental.zip › inverse_problems_leveraging_pr-Supplementary Material/NEURIPS21_SUPPLEMENT/Code/LICENSE]

MIT License

Copyright (c) 2021 Anonymous Authors

Permission is hereby granted, free of charge, to any person obtaining a copy
of this software and associated documentation files (the "Software"), to deal
in the Software without restriction, including without limitation the rights
to use, copy, modify, merge, publish, distribute, sublicense, and/or sell
copies of the Software, and to permit persons to whom the Software is
furnished to do so, subject to the following conditions:

The above copyright notice and this permission notice shall be included in all
copies or substantial portions of the Software.

THE SOFTWARE IS PROVIDED "AS IS", WITHOUT WARRANTY OF ANY KIND, EXPRESS OR
IMPLIED, INCLUDING BUT NOT LIMITED TO THE WARRANTIES OF MERCHANTABILITY,
FITNESS FOR A PARTICULAR PURPOSE AND NONINFRINGEMENT. IN NO EVENT SHALL THE
AUTHORS OR COPYRIGHT HOLDERS BE LIABLE FOR ANY CLAIM, DAMAGES OR OTHER
LIABILITY, WHETHER IN AN ACTION OF CONTRACT, TORT OR OTHERWISE, ARISING FROM,
OUT OF OR IN CONNECTION WITH THE SOFTWARE OR THE USE OR OTHER DEALINGS IN THE
SOFTWARE.

The following copyrighted materials are also included:
- OpenAI CLIP (https://github.com/openai/CLIP), (c) 2021 OpenAI (MIT License)
- Pytorch-lightning (https://github.com/PyTorchLightning/pytorch-lightning), (c) 2018-2021 William Falcon (Apache License v2.0)
- Deep Decoder (https://github.com/reinhardh/supplement_deep_decoder), (c) Reinhard Heckel and Paul Hand (Apache License v2.0)

The following datasets are used:
- ImageNet: https://image-net.org/index.php
- CIFAR10/CIFAR100: https://www.cs.toronto.edu/~kriz/cifar.html
- STL10: https://cs.stanford.edu/~acoates/stl10/
- COVID Xray dataset: https://github.com/ieee8023/covid-chestxray-dataset
