# Supplementary material
Source: ML conference proceedings conference paper supplement (https://proceedings.neurips.cc/paper_files/paper/2021/hash/498f940d9b933c529b06aa96d18f7eda-Abstract.html)
Supplement: Supplementary file 1 [file 498f940d9b933c529b06aa96d18f7eda-Supplemental.zip › inverse_problems_leveraging_pr-Supplementary Material/NEURIPS21_SUPPLEMENT/Code/requirements.txt]

absl-py==0.12.0
aiohttp==3.7.4.post0
async-timeout==3.0.1
attrs==20.3.0
cachetools==4.2.1
certifi==2020.12.5
chardet==4.0.0
cycler==0.10.0
decorator==4.4.2
fsspec==0.8.7
ftfy==5.9
future==0.18.2
google-auth==1.28.0
google-auth-oauthlib==0.4.4
grpcio==1.36.1
h5py==2.10.0
idna==2.10
imageio==2.9.0
importlib-metadata==3.10.0
kiwisolver==1.3.1
Markdown==3.3.4
matplotlib==3.4.2
mpi4py==3.0.2
multidict==5.1.0
networkx==2.5.1
numpy==1.20.2
oauthlib==3.1.0
pandas==1.1.5
Pillow==8.2.0
pip==21.0.1
protobuf==3.15.7
pyasn1==0.4.8
pyasn1-modules==0.2.8
pyparsing==2.4.7
python-dateutil==2.8.1
pytorch-lightning==1.2.6
pytz==2021.1
PyWavelets==1.1.1
PyYAML==5.3.1
regex==2021.3.17
requests==2.25.1
requests-oauthlib==1.3.0
rsa==4.7.2
scikit-image==0.18.1
scipy==1.6.3
setuptools==54.2.0
six==1.15.0
tensorboard==2.4.1
tensorboard-plugin-wit==1.8.0
tifffile==2021.4.8
torch==1.8.1
torchaudio==0.8.1
torchmetrics==0.2.0
torchvision==0.9.1
tqdm==4.59.0
typing-extensions==3.7.4.3
urllib3==1.26.4
wcwidth==0.2.5
Werkzeug==1.0.1
wheel==0.36.2
yarl==1.6.3
zipp==3.4.1
